# Supplementary material
Source: PubMed Central journal article supplement (PMC1978089)
Supplement: 7401025-s1.pdf [file 7401025-s1.pdf]

## Supplementary Information

**Determination of cyclic nucleotide content by RP-HPLC.** HPLC equipment was from Waters GmbH (Eschborn, Germany). We used a LiChrosphere<sup>®</sup> 100 RP-18 column (5 $\mu$ m) (Merck, Darmstadt, Germany). The absorption was detected at a wavelength of 258 nm. Protein samples were denatured with 5 % (v/v) perchloric acid at 4°C for 30 minutes and centrifuged at 17,600 g at 4°C for 30 min. The supernatant was neutralized und passed over the column. A linear gradient was produced from solution A (5 mM KH<sub>2</sub>PO<sub>4</sub>, pH 5.0) and solution B (methanol, HPLC grade) at a flow rate of 1.2 ml/min.

The gradient for the cAMP calibration was:

| Time (min) | Solution A (%) | Solution B (%) |
|------------|----------------|----------------|
| 0          | 100            | 0              |
| 4          | 85             | 15             |
| 9          | 30             | 70             |
| 10         | 100            | 0              |

For the calibration of 8-CPT-cGMP and mixtures of cyclic nucleotides, the gradient was:

| Time (min) | Solution A (%) | Solution B (%) |
|------------|----------------|----------------|
| 0          | 100            | 0              |
| 4          | 85             | 15             |
| 9          | 30             | 70             |
| 12         | 0              | 100            |
| 14         | 0              | 100            |
| 15         | 100            | 0              |

**Analysis of CD spectra.** CD spectra were analyzed using the CDSSTR (Lobley et al, 2002; Whitmore & Wallace, 2004) software of the DichroWeb online CD analysis facility.

**Analysis of ligand binding using fluorescence:** We analyzed the fluorescence binding data in terms of a simple binding scheme:

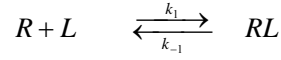

$K_D$  is given by:

$$K_D = \frac{k_{-1}}{k_1} = \frac{R \cdot L}{RL} = \frac{(R_t - RL)(L_t - RL)}{RL} \quad (1)$$

$$\rightarrow RL = \frac{1}{2}(R_t + L_t + K_D) - \sqrt{\frac{1}{4}(-R_t - L_t - K_D)^2 - R_t \cdot L_t} \quad (2)$$

$$\Delta F = RL \cdot x \quad (3)$$

wherein  $R$ ,  $L$ , and  $RL$  refer to the free concentrations of the receptor, ligand, and receptor-ligand complex, respectively.  $R_t$  and  $L_t$  refer to the total concentrations of receptor and ligand, respectively. The normalization factor  $x$  relates the concentration of bound 8-NBD-cNMP to the fluorescence change ( $\Delta F$ ).

In competition experiments, binding of 8-NBD-cAMP to the protein was studied in the presence of various amounts of cAMP or cGMP:

$$K_{Df} = \frac{(R_t - RL_f - RL_n)(L_{tf} - RL_f)}{RL_f} \quad (4)$$

$$K_{Dn} = \frac{(R_t - RL_f - RL_n)(L_{tn} - RL_n)}{RL_n} \quad (5)$$

wherein  $K_{Df}$  and  $K_{Dn}$  denote the  $K_D$  of the fluorescent and non-fluorescent ligand;  $RL_f$ , the concentration of the complex between receptor and the fluorescent ligand;  $RL_n$ , the concentration of the non-fluorescent ligand complex;  $L_{tf}$  and  $L_{tn}$ , denote the total

concentration of fluorescent and non-fluorescent ligand. Combining equations (4) and (5) and rearranging yields:

$$\begin{aligned}
 & \left(1 - \frac{K_{Dn}}{K_{Df}}\right) RL_f^3 + \left(K_{Dn} - K_{Df} - R_t + R_t \frac{K_{Dn}}{K_{Df}} - L_{tf} + L_m + 2L_{tf} \frac{K_{Dn}}{K_{Df}}\right) RL_f^2 + \\
 & \left(R_t L_{tf} - \frac{R_t L_{tf} K_{Dn}}{K_{Df}} - L_{tf}^2 \frac{K_{Dn}}{K_{Df}} - L_m L_{tf} - K_{Dn} L_{tf} - \frac{R_t L_{tf} K_{Dn}}{K_{Df}}\right) RL_f + \\
 & \frac{R_t L_{tf}^2 K_{Dn}}{K_{Df}} = 0
 \end{aligned} \tag{6}$$

Equation 6 was solved for  $RL_f$  using Cardano's method. Furthermore,

$$\Delta F = RL_f \cdot x \tag{7}$$

The data was fitted with a least-squares routine to equation 7.

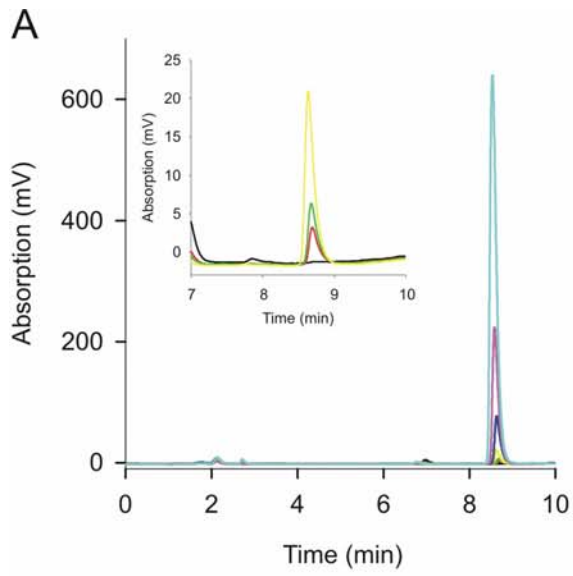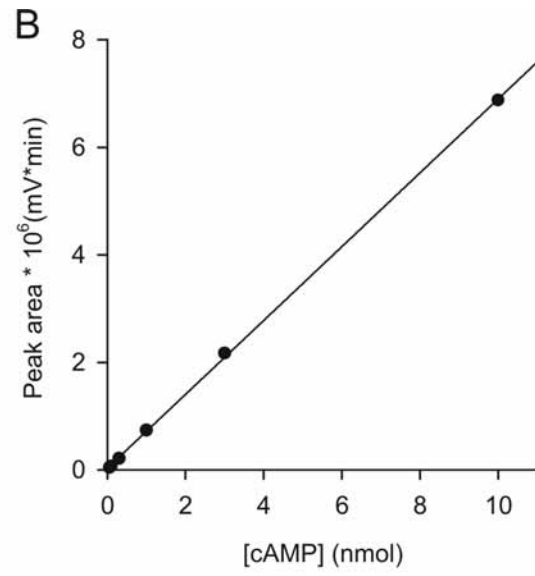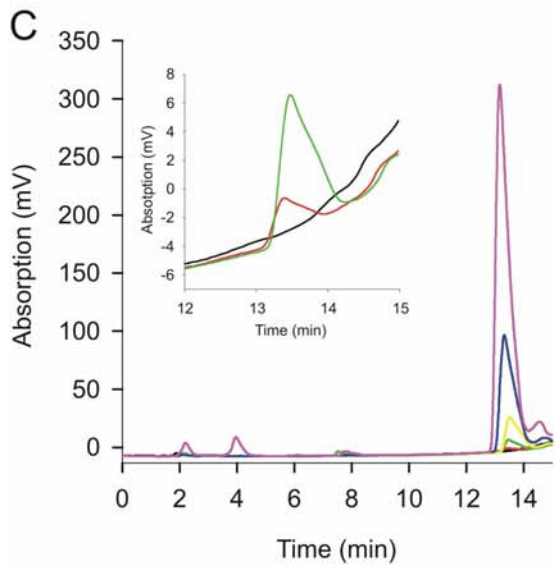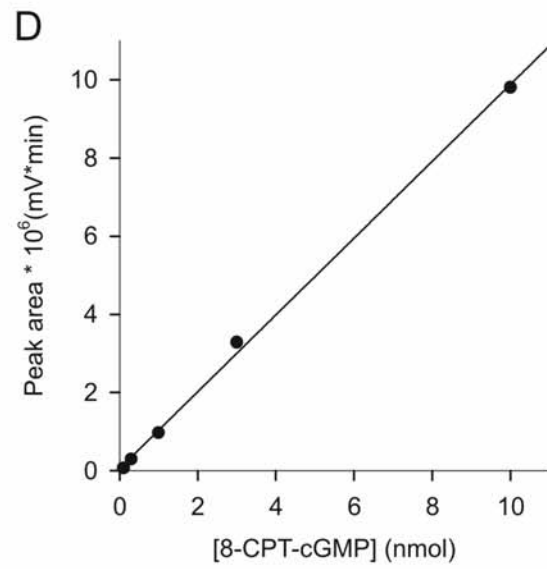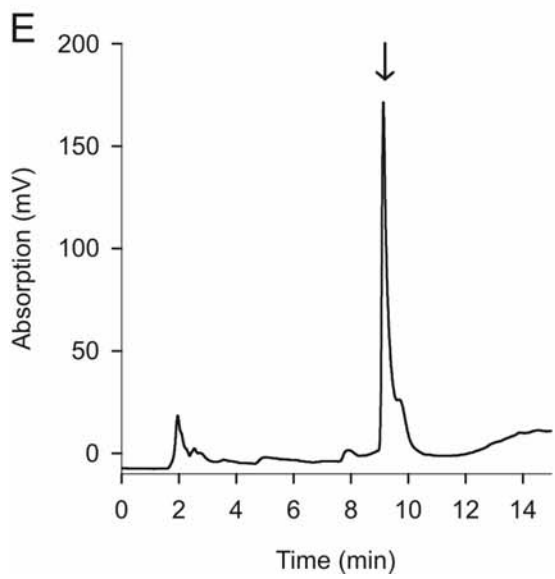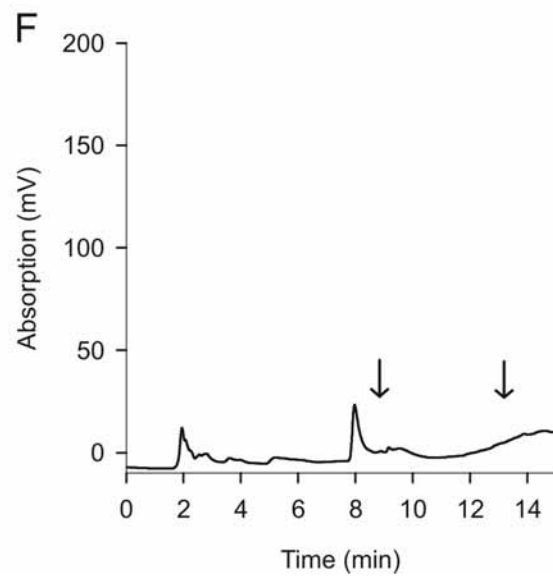

**Supplementary Figure 1:** Determination of the amount of cyclic nucleotides in the protein sample by RP-HPLC. (A) Calibration of the column with cAMP. The different traces show various amounts of cAMP passed over the column (in nmol): 0 (black), 0.06 (red), 0.1 (green), 0.3 (yellow), 1 (dark blue), 3 (purple) and 10 (light blue). The inset shows the traces  $\leq 0.3$  nmol cAMP on an expanded scale. cAMP elutes at a retention time of 8.7 min. The average retention time was  $8.8 \pm 0.2$  min (38 experiments). (B) Linear regression of the calibration shown in (A). The peak area was plotted against the cAMP amount. The regression line ( $y = a x + y_0$ ; with  $y$  = peak area and  $x$  = cAMP amount) was fitted with the parameters:  $a = 686,996$  mV min nmol<sup>-1</sup> and  $y_0 = 30,578$  mV min. (C) Calibration of the column with 8-CPT-cGMP. The traces show various amounts of 8-CPT-cGMP passed over the column (in nmol): 0 (black), 0.1 (red), 0.3 (green), 1 (yellow), 3 (dark blue), and 10 (purple). The inset shows traces  $\leq 0.3$  nmol on an expanded scale. 8-CPT-cGMP elutes at a retention time between 13.2 – 15.5 min depending on the concentration. The average retention time was  $13.2 \pm 0.4$  min (17 experiments). (D) Linear regression of the calibration shown in (C). The peak area was plotted against the 8-CPT-cGMP amount. Fit parameters:  $a = 983,094$  mV min nmol<sup>-1</sup> and  $y_0 = 53,795$  mV min. (E) Analysis of the supernatant of 4.9 nmol denatured mICNG protein. cAMP (arrow) eluted at a retention time of 9.1 min. The peak area corresponds to 3.7 nmol cAMP, i.e. 75.5% of the binding sites are occupied by cAMP. (F) Analysis of the supernatant of 2.5 nmol denatured mICNG protein after removal of cAMP by the 8-CPT-cGMP wash procedure. cAMP (left arrow) as well as 8-CPT-cGMP (right arrow) are below the detection limit.

## Supplementary Figure 2

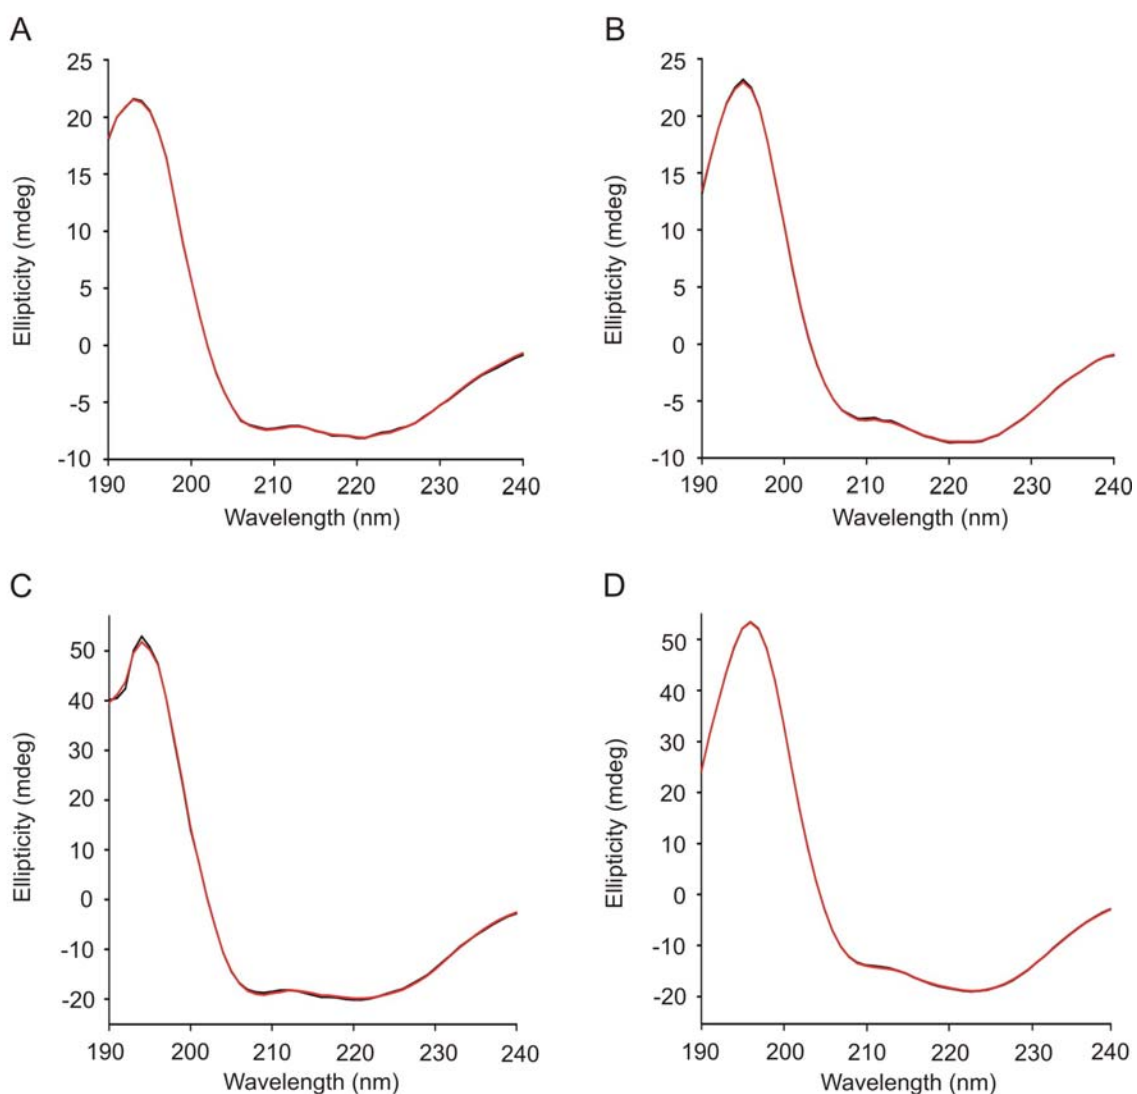

**Supplementary Figure 2:** CD spectra of the purified CNBD protein (black). The traces in red have been computed by the program CDSSTR (Lobley et al, 2002; Whitmore et al, 2004). (A) Refolded CNBD (8  $\mu$ M) in the absence of cAMP. (B) Refolded CNBD (8  $\mu$ M) in the presence of cAMP. (C) Mutant R348A (11  $\mu$ M). (D) CNBD after purification (9  $\mu$ M). Spectra were measured in 0.1 cm cuvettes (A, B) or in 0.2 cm cuvettes (C, D).

**Supplementary Table 1:** Composition of secondary structure elements (SSE) of CNBD proteins computed by the algorithm CDSSTR (Lobley et al, 2002; Whitmore et al, 2004) for the CD spectra shown in Supplementary Figure 2 (data given in %).

|                      | $\alpha_R$ | $\alpha_D$ | $\beta_1$ | $\beta_2$ | T  | UO |
|----------------------|------------|------------|-----------|-----------|----|----|
| Refolded CNBD        | 26         | 16         | 12        | 6         | 14 | 26 |
| Refolded CNBD + cAMP | 28         | 20         | 10        | 4         | 17 | 21 |
| CNBD (R348A)         | 23         | 17         | 12        | 7         | 18 | 23 |
| Native CNBD          | 26         | 18         | 9         | 7         | 19 | 21 |

$\alpha_R$ , regular helix;  $\alpha_D$ , distorted helix;  $\beta_1$ , regular strand;  $\beta_2$ , distorted strand; T, turns; UO, unordered.

**Supplementary Table 2:** Average SSE derived from the CD spectra of the CNBD proteins from 2-4 experiments (data given in %).

|                      | $\alpha_R$ | $\alpha_D$ | $\beta_1$ | $\beta_2$ | T    | UO   |
|----------------------|------------|------------|-----------|-----------|------|------|
| Refolded CNBD        | 25.8       | 17.5       | 11.0      | 6.5       | 16.5 | 22.8 |
| Refolded CNBD + cAMP | 26.8       | 18.8       | 10.5      | 6.3       | 16.5 | 20.8 |
| CNBD (R348A)         | 23.5       | 16.5       | 11.5      | 6.5       | 15.0 | 26.5 |
| Native CNBD          | 26.0       | 17.3       | 9.8       | 6.3       | 16.8 | 23.8 |

The fractions of helix  $\alpha$  and sheet  $\beta$  given in the text were obtained by adding the corresponding regular and distorted fractions,  $\alpha = \alpha_R + \alpha_D$ ;  $\beta = \beta_1 + \beta_2$ .

**Supplementary Table 3:** Residues contributing to the SSE determined from the crystal structures of the liganded CNBD protein and the R348A mutant (Kabsch & Sander, 1983).

The R348A mutant contains 30 % helices and 26 % sheets. The ligand-bound CNBD protein contains 36 % helices and 24 % sheets. The PDB entries for the liganded CNBD and the R348A mutant are 1VP6 and 1U12 (Clayton et al, 2004), respectively. The total number of residues of the CNBD protein is 142 amino acids.

| R348A          |     |          | Liganded CNBD  |     |          |
|----------------|-----|----------|----------------|-----|----------|
| residue number | SSE | residues | residue number | SSE | residues |
| 221-231        | H   | 11       | 220-230        | H   | 11       |
| 241-248        | H   | 8        | 241-250        | H   | 9        |
| 252-256        | S   | 5        | 252-256        | S   | 4        |
| 261-265        | S   | 5        | 261-263        | S   | 3        |
| 271-277        | S   | 7        | 271-276        | S   | 6        |
| 280-283        | S   | 4        | 279-284        | S   | 5        |
| 288-291        | S   | 3        | 288-291        | S   | 3        |
| 294-297        | S   | 3        | 294-297        | S   | 3        |
| 310-313        | S   | 4        | 298-303        | H   | 6        |
| 317-323        | S   | 6        | 311-313        | S   | 3        |
| 324-333        | H   | 10       | 317-323        | S   | 7        |
| 336-348        | H   | 13       | 324-333        | H   | 11       |
|                |     |          | 335-348        | H   | 14       |

H, helix; S, sheet



## REFERENCES

1. Clayton GM, Silverman WR, Heginbotham L, Morais-Cabral JH (2004) Structural basis of ligand activation in a cyclic nucleotide regulated potassium channel. *Cell*, **119**: 615-627
2. Kabasch W, Sander C (1983) Dictionary of protein secondary structure: Pattern recognition of hydrogen-bonded and geometrical features. *Biopolymers*, **22**: 2577-2637
3. Lobley A, Whitmore L, Wallace BA (2002) DICHROWEB: an interactive website for the analysis of protein secondary structure from circular dichroism spectra. *Bioinformatics*, **18**: 211-212
4. Whitmore L, Wallace BA (2004) DICHROWEB, an online server for protein secondary structure analyses from circular dichroism spectroscopic data. *Nucleic Acids Res*, **32**: 668-673
